# Supplementary material for: ALS-L1023 from Melissa officinalis Alleviates Liver Fibrosis in a Non-Alcoholic Fatty Liver Disease Model
Source: MDPI journal article supplement (doi:10.3390/life13010100), 2022-12-29
Supplement: s1 [file s1]

**A**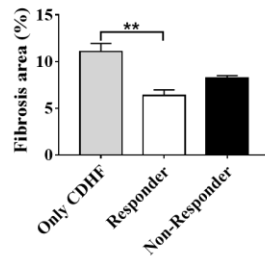**B**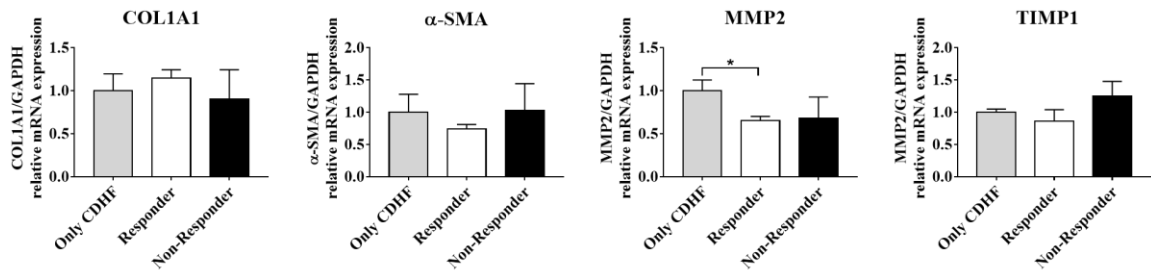**C**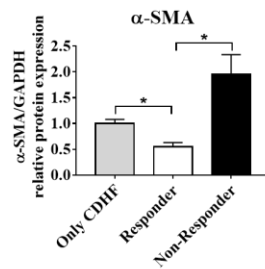

**Supplementary Figure S1.** Comparison of anti-fibrosis effect for responders and non-responders in the low dose group of ALS-L1023.

(A) Area of fibrosis. (B) mRNA expression of fibrosis markers in liver tissue. (C) protein expression of fibrosis marker in liver tissue. Data are presented as mean  $\pm$  SEM, analyzed by t-test and one-way ANOVA. \* $p < 0.05$  and \*\* $p < 0.01$  for statistical significance.
